# Supplementary material for: Full-Length Transcriptome Profiling of Coridius chinensis Mitochondrial Genome Reveals the Transcription of Genes with Ancestral Arrangement in Insects
Source: MDPI journal article supplement (doi:10.3390/genes14010225), 2023-01-15
Supplement: s1 [file s1]

## Supplementary Tables

**Table S1.** The mitochondrial polycistronic transcripts, antisense transcripts and lncRNAs from control region of *Coridius chinensis* mitochondrial genome.

| Serial number | Polycistronic transcripts, antisense transcripts and lncRNAs from CR | Coding strand | position (J strand as reference) | Length/nt |
|---------------|----------------------------------------------------------------------|---------------|----------------------------------|-----------|
| 71699058      | trnM/ND2*                                                            | J             | 155-357                          | 203       |
| 172952174     | trnM/ND2*                                                            | J             | 155-357                          | 203       |
| 108333789     | trnM/ND2*                                                            | J             | 155-719                          | 565       |
| 146670099     | trnM/ND2*                                                            | J             | 155-773                          | 619       |
| 168166122     | trnM/ND2*                                                            | J             | 155-781                          | 627       |
| 125173891     | trnM/ND2                                                             | J             | 155-1204                         | 1050      |
| 9830431       | trnM/ND2*                                                            | J             | 156-406                          | 251       |
| 67110025      | trnM/ND2*                                                            | J             | 157-773                          | 617       |
| 97190650      | trnW/astrnC/astrnY/COX1*                                             | J             | 1205-2179                        | 975       |
| 17237992      | *astrnC/astrnY/COX1/trnL/COX2                                        | J             | 1269-3693                        | 2425      |
| 11994350      | *astrnC/astrnY/COX1*                                                 | J             | 1269-2179                        | 911       |
| 30802161      | *astrnC/astrnY/COX1*                                                 | J             | 1269-2179                        | 911       |
| 62589691      | *astrnC/astrnY/COX1*                                                 | J             | 1269-2179                        | 911       |
| 108921764     | *astrnC/astrnY/COX1*                                                 | J             | 1269-2179                        | 911       |
| 111085959     | *astrnC/astrnY/COX1*                                                 | J             | 1269-2179                        | 911       |
| 164495598     | *astrnC/astrnY/COX1*                                                 | J             | 1269-2434                        | 1166      |
| 65143527      | *astrnC/astrnY/COX1                                                  | J             | 1269-2945                        | 1677      |
| 11993529      | *astrnC/astrnY/COX1/trnL/COX2*                                       | J             | 1269-3249                        | 1981      |
| 17956950      | *astrnC/astrnY/COX1*                                                 | J             | 1270-2179                        | 910       |
| 108856142     | *COX1/trnL/COX2                                                      | J             | 2243-3698                        | 1456      |
| 121834097     | *COX1/trnL/COX2                                                      | J             | 1693-3698                        | 2006      |
| 163840600     | *COX1/trnL/COX2                                                      | J             | 2369-3698                        | 1330      |
| 21168277      | *trnL/COX2*                                                          | J             | 2970-3225                        | 256       |
| 85524510      | trnL/COX2*                                                           | J             | 2949-3270                        | 322       |
| 103416043     | trnL/COX2*                                                           | J             | 2949-3395                        | 447       |
| 42665688      | trnL/COX2*                                                           | J             | 2949-3489                        | 541       |
| 117967331     | trnL/COX2*                                                           | J             | 2949-3687                        | 739       |
| 153026922     | trnL/COX2*                                                           | J             | 2949-3692                        | 744       |
| 26214617      | trnL/COX2                                                            | J             | 2949-3698                        | 750       |
| 29361021      | trnL/COX2                                                            | J             | 2949-3698                        | 750       |
| 69994081      | trnL/COX2                                                            | J             | 2949-3698                        | 750       |
| 76416946      | trnL/COX2                                                            | J             | 2949-3698                        | 750       |
| 125766416     | trnL/COX2                                                            | J             | 2949-3698                        | 750       |
| 133368572     | trnL/COX2                                                            | J             | 2949-3698                        | 750       |
| 171510595     | trnL/COX2                                                            | J             | 2949-3698                        | 750       |
| 35915432      | trnD/ATP8/ATP6                                                       | J             | 3775-4665                        | 891       |
| 97714380      | trnD/ATP8/ATP6                                                       | J             | 3775-4665                        | 891       |
| 174393085     | trnD/ATP8/ATP6                                                       | J             | 3775-4665                        | 891       |
| 77007354      | *trnD/ATP8/ATP6                                                      | J             | 3801-4665                        | 865       |
| 151521295     | *COX3/trnG/ND3                                                       | J             | 4913-5880                        | 968       |
| 142213254     | COX3/trnG/ND3/trnA                                                   | J             | 4666-5949                        | 1284      |
| 114295198     | trnG/ND3                                                             | J             | 5454-5880                        | 427       |
| 163776606     | trnG/ND3                                                             | J             | 5454-5880                        | 427       |
| 44763965      | trnG/ND3/trnA/trnR                                                   | J             | 5454-6017                        | 564       |
| 72288869      | trnA/trnR/trnN/trnS*                                                 | J             | 5881-6122                        | 242       |
| 14942667      | trnS/trnE/astrnF/asND5*                                              | J             | 6085-7074                        | 990       |
| 155714129     | trnS/trnE/astrnF/asND5*                                              | J             | 6085-7074                        | 990       |
| 103483889     | astrnF/asND5*                                                        | J             | 6219-6780                        | 562       |
| 166265604     | *asND5/astrnH/asND4*                                                 | J             | 6323-8449                        | 2127      |
| 75104507      | *asND5*                                                              | J             | 6891-7918                        | 1028      |
| 12780348      | *asND5*                                                              | J             | 6988-7937                        | 950       |
| 83690892      | *asND5*                                                              | J             | 7018-7571                        | 554       |
| 140706493     | *asND5/astrnH/asND4*                                                 | J             | 7136-8435                        | 1300      |

|           |                                          |   |             |      |
|-----------|------------------------------------------|---|-------------|------|
| 80284123  | *asND5/astnH/asND4*                      | J | 7375-8449   | 1075 |
| 116852750 | *asND5/astnH/asND4*                      | J | 7437-8062   | 626  |
| 158859677 | *asND5/astnH/asND4*                      | J | 7549-8449   | 901  |
| 46137738  | *asND5/astnH/asND4*                      | J | 7858-8685   | 828  |
| 112199986 | *asND4*                                  | J | 8109-8882   | 774  |
| 113904180 | trnT/astnP/ND6*                          | J | 9668-10088  | 421  |
| 121045612 | *trnT/astnP/ND6                          | J | 9686-10283  | 598  |
| 175112492 | astnP/ND6*                               | J | 9733-10125  | 393  |
| 145689382 | astnP/ND6                                | J | 9733-10283  | 551  |
| 3541110   | astnP/ND6/CYTB*                          | J | 9733-10580  | 848  |
| 12845817  | astnP/ND6/CYTB*                          | J | 9733-11403  | 1671 |
| 109969504 | astnP/ND6/CYTB                           | J | 9733-11420  | 1688 |
| 169151163 | astnP/ND6/CYTB                           | J | 9733-11420  | 1688 |
| 173474771 | astnP/ND6/CYTB                           | J | 9733-11420  | 1688 |
| 22284284  | ND6/CYTB*                                | J | 9801-10677  | 877  |
| 5243673   | *CR                                      | J | 15377-      | 566  |
| 95946640  | *CR                                      | J | 15377-      | 857  |
| 119408095 | *CR/trnI*                                | J | 15378-45    | 857  |
| 127142199 | *CR/trnI/astnQ/trnM/ND2*                 | J | 15379-408   | 1244 |
| 94570961  | *astnW/asND2/astnM                       | N | 1260-143    | 1118 |
| 160368949 | *astnW/asND2*                            | N | 1260-279    | 982  |
| 93192919  | *astnW/asND2*                            | N | 1223-428    | 796  |
| 98435186  | *asCOX1                                  | N | 1743-1403   | 341  |
| 158795491 | astnD/astnK/asCOX2/astnL/asCOX1*         | N | 3842-2219   | 1624 |
| 151388464 | *asCOX1*                                 | N | 2878-2504   | 375  |
| 20317147  | *ND5/trnF/astnE/astnS/astnN/astnR/astnA* | N | 7609-5928   | 1682 |
| 151519544 | trnH/ND5*                                | N | 8058-7459   | 600  |
| 101714334 | *asND6/trnP/astnT/ND4L/ND4*              | N | 9889-8822   | 1068 |
| 127861783 | *ND1/astnS/asCYTB/asND6                  | N | 11704-9798  | 1907 |
| 41290106  | *asND6                                   | N | 10144-9798  | 347  |
| 14877222  | *asCYTB/asND6                            | N | 10573-9798  | 776  |
| 134348951 | *asCYTB/asND6                            | N | 10573-9798  | 776  |
| 58393631  | *asCYTB/asND6                            | N | 10634-9798  | 837  |
| 167773527 | *asCYTB/asND6                            | N | 10634-9798  | 837  |
| 172033889 | *ND1/astnS/asCYTB/asND6                  | N | 11537-9798  | 1740 |
| 144704395 | *ND1/astnS/asCYTB/asND6                  | N | 11749-9798  | 1952 |
| 147785853 | *ND1/astnS/asCYTB/asND6                  | N | 11791-9798  | 1994 |
| 118751899 | *ND1/astnS/asCYTB/asND6*                 | N | 11549-10189 | 1361 |
| 73925983  | ND1/astnS/asCYTB*                        | N | 12433-10611 | 1823 |
| 173279751 | ND1/astnS/asCYTB*                        | N | 12433-10727 | 1707 |
| 81529632  | ND1/astnS/asCYTB*                        | N | 12433-10768 | 1666 |
| 151390825 | *ND1/astnS/asCYTB*                       | N | 12099-11070 | 1030 |
| 53085058  | *ND1/astnS/asCYTB*                       | N | 12279-11392 | 888  |
| 136907277 | *trnL/ND1                                | N | 12454-11508 | 947  |
| 46336280  | *trnL/ND1                                | N | 12454-11508 | 947  |
| 177867566 | trnL/ND1                                 | N | 12500-11508 | 993  |
| 6097129   | *lrRNA/trnL/ND1                          | N | 12699-11508 | 1192 |
| 165939856 | *lrRNA/trnL/ND1                          | N | 12786-11508 | 1279 |
| 140050475 | *lrRNA/trnL/ND1                          | N | 12835-11508 | 1328 |
| 95226179  | *lrRNA/trnL/ND1                          | N | 12885-11508 | 1378 |
| 6752360   | *lrRNA/trnL/ND1                          | N | 13013-11508 | 1506 |
| 152176036 | *lrRNA/trnL*                             | N | 13687-12444 | 1244 |
| 167314352 | *lrRNA/trnL*                             | N | 13263-12448 | 816  |
| 176555798 | *lrRNA/trnL*                             | N | 12844-12455 | 390  |
| 93063166  | *lrRNA/trnL*                             | N | 13499-12455 | 1045 |
| 44958672  | *lrRNA/trnL*                             | N | 13273-12456 | 818  |
| 119406606 | *lrRNA/trnL*                             | N | 13687-12456 | 1232 |
| 115018213 | *lrRNA/trnL*                             | N | 13266-12458 | 809  |
| 167314195 | *lrRNA/trnL*                             | N | 13266-12469 | 798  |
| 11272833  | *lrRNA/trnL*                             | N | 13362-12469 | 894  |
| 48628105  | *lrRNA/trnL*                             | N | 13484-12469 | 1016 |
| 30803508  | *lrRNA/trnL*                             | N | 13484-12475 | 1010 |

|           |                   |   |             |      |
|-----------|-------------------|---|-------------|------|
| 19988571  | *lrRNA/trnL*      | N | 12937-12478 | 460  |
| 9438918   | *lrRNA/trnL*      | N | 13499-12478 | 1022 |
| 41290225  | lrRNA/trnL*       | N | 13774-12478 | 1297 |
| 63899301  | *lrRNA/trnL*      | N | 13687-12479 | 1209 |
| 108331376 | *lrRNA/trnL*      | N | 13313-12480 | 834  |
| 162595865 | *lrRNA/trnL*      | N | 13687-12481 | 1207 |
| 114099300 | *lrRNA/trnL*      | N | 13128-12488 | 641  |
| 132907624 | *lrRNA/trnL*      | N | 13263-12488 | 776  |
| 44827905  | *lrRNA/trnL*      | N | 13265-12488 | 778  |
| 98370343  | *lrRNA/trnL*      | N | 13265-12488 | 778  |
| 18090750  | *lrRNA/trnL*      | N | 13362-12488 | 875  |
| 122224857 | *lrRNA/trnL*      | N | 13430-12488 | 943  |
| 102434081 | *lrRNA/trnL*      | N | 13498-12488 | 1011 |
| 147260003 | lrRNA/trnL*       | N | 13774-12490 | 1285 |
| 162398372 | *lrRNA/trnL*      | N | 12844-12490 | 355  |
| 143853399 | *lrRNA/trnL*      | N | 13161-12490 | 672  |
| 91555321  | *lrRNA/trnL*      | N | 13348-12490 | 859  |
| 146670351 | *lrRNA/trnL*      | N | 13498-12490 | 1009 |
| 13500691  | *lrRNA/trnL*      | N | 13498-12490 | 1009 |
| 37161214  | *lrRNA/trnL*      | N | 13687-12490 | 1198 |
| 55248597  | lrRNA/trnL*       | N | 13774-12490 | 1285 |
| 11405278  | *lrRNA/trnL*      | N | 12844-12491 | 354  |
| 1508536   | *lrRNA/trnL*      | N | 13362-12491 | 872  |
| 16973876  | *lrRNA/trnL*      | N | 13362-12491 | 872  |
| 27724293  | *lrRNA/trnL*      | N | 13362-12491 | 872  |
| 169739026 | *lrRNA/trnL*      | N | 13495-12491 | 1005 |
| 63047974  | *lrRNA/trnL*      | N | 13687-12491 | 1197 |
| 110036708 | *lrRNA/trnL*      | N | 13687-12491 | 1197 |
| 84937484  | *lrRNA/trnL*      | N | 13266-12492 | 775  |
| 163119291 | *lrRNA/trnL*      | N | 13343-12492 | 852  |
| 175507228 | *lrRNA/trnL*      | N | 13362-12492 | 871  |
| 132843169 | *lrRNA/trnL*      | N | 13388-12492 | 897  |
| 41028435  | *lrRNA/trnL*      | N | 13484-12492 | 993  |
| 149488191 | *lrRNA/trnL*      | N | 13498-12492 | 1007 |
| 56756660  | *lrRNA/trnL*      | N | 13687-12492 | 1196 |
| 114427475 | *lrRNA/trnL*      | N | 13687-12492 | 1196 |
| 115411620 | *lrRNA/trnL*      | N | 13687-12492 | 1196 |
| 175048307 | *lrRNA/trnL*      | N | 13687-12492 | 1196 |
| 170132535 | *lrRNA/trnL*      | N | 13347-12493 | 855  |
| 131532965 | *lrRNA/trnL*      | N | 13161-12495 | 667  |
| 107022352 | *lrRNA/trnL*      | N | 13362-12495 | 868  |
| 40503028  | *lrRNA/trnL*      | N | 13484-12495 | 990  |
| 113901859 | *lrRNA/trnL*      | N | 13687-12495 | 1193 |
| 170133548 | *lrRNA/trnL*      | N | 13687-12495 | 1193 |
| 34605046  | *lrRNA/trnL*      | N | 13484-12496 | 989  |
| 19529819  | srRNA/trnV/lrRNA* | N | 14660-13750 | 911  |
| 41746703  | srRNA/trnV*       | N | 14662-13811 | 852  |
| 74056825  | srRNA/trnV*       | N | 14661-13813 | 849  |
| 150077470 | srRNA/trnV*       | N | 14661-13820 | 842  |
| 154731009 | srRNA/trnV*       | N | 14661-13824 | 838  |
| 113378294 | *CR/srRNA         | N | 14841-13845 | 997  |
| 138412294 | *CR/srRNA         | N | 15189-12846 | 2344 |
| 167969819 | *CR/srRNA*        | N | 14713-13850 | 864  |
| 113117329 | *CR/srRNA*        | N | 14710-13938 | 773  |
| 30934540  | *CR*              | N | 14972-14901 | 72   |
| 9307853   | *CR*              | N | 15027-14901 | 127  |
| 149685560 | *CR*              | N | 15027-14901 | 127  |
| 134283344 | *CR*              | N | 15028-14901 | 128  |
| 97583892  | *CR*              | N | 15189-14901 | 289  |
| 90702191  | astrnL/CR*        | N | 72-15406    | 862  |

\* represents the incomplete transcripts.

**Table S2.** The mitochondrial tRNAs of *Coridius chinensis*.

| Serial number | tRNA  | position of tRNA gene | Coding strand | position of tRNA (J strand as reference) | Length/nt |
|---------------|-------|-----------------------|---------------|------------------------------------------|-----------|
| 169739742     | *trnI | 1-71                  | J             | 19-73                                    | 55        |
| 57214011      | trnD  | 3775-3842             | J             | 3775-3844                                | 70        |
| 50266369      | *trnG | 5454-5518             | J             | 5463-5520                                | 58        |
| 108265960     | trnG* | 5454-5518             | J             | 5454-5503                                | 50        |
| 126943323     | trnG  | 5454-5518             | J             | 5454-5520                                | 67        |
| 135005976     | trnG  | 5454-5518             | J             | 5454-5520                                | 67        |
| 113969861     | trnA  | 5881-5949             | J             | 5881-5951                                | 71        |
| 118950572     | trnA  | 5881-5949             | J             | 5881-5951                                | 71        |
| 133237599     | trnA  | 5881-5949             | J             | 5881-5951                                | 71        |
| 21956166      | trnA  | 5881-5949             | J             | 5881-5951                                | 71        |
| 120718776     | trnA  | 5881-5949             | J             | 5881-5950                                | 70        |
| 47711722      | trnA  | 5881-5949             | J             | 5881-5951                                | 71        |
| 23530247      | *trnN | 6019-6084             | J             | 6035-6086                                | 52        |
| 52758504      | *trnN | 6019-6084             | J             | 6035-6086                                | 52        |
| 60558065      | *trnN | 6019-6084             | J             | 6035-6086                                | 52        |
| 90112428      | *trnN | 6019-6084             | J             | 6035-6086                                | 52        |
| 98239177      | trnS  | 6085-6153             | J             | 6085-6154                                | 70        |
| 164364335     | trnS  | 6085-6153             | J             | 6085-6155                                | 71        |
| 166922049     | trnS  | 6085-6153             | J             | 6085-6155                                | 71        |
| 149618927     | *trnS | 6085-6153             | J             | 6092-6154                                | 63        |
| 82444884      | *trnT | 9668-9732             | J             | 9685-9734                                | 50        |
| 24642121      | trnH  | 8057-7992             | N             | 8058-7989                                | 70        |
| 35389662      | trnH  | 8057-7992             | N             | 8058-7990                                | 69        |
| 158206266     | trnV  | 13841-13775           | N             | 13841-13773                              | 69        |
| 21629291      | *trnV | 13841-13775           | N             | 13827-13774                              | 54        |
| 175639039     | *trnV | 13841-13775           | N             | 13833-13774                              | 60        |

\* represents the incomplete transcripts.
